# Supplementary material for: Analytical Ultracentrifugation-Calibrated Anion-Exchange Chromatography for Sensitive and Intact Determination of Osteopontin in Infant Formula and Dairy Products
Source: PubMed Central journal article supplement (PMC10515612; doi:10.1021/acs.jafc.3c03589), 2023-09-05
Supplement: jf3c03589_si_001.pdf [file jf3c03589_si_001.pdf]

---

## Supporting Information

# **Analytical ultra-centrifugation-calibrated anion-exchange chromatography for sensitive and intact determination of Osteopontin in infant formula and dairy products**

Xiangxin Wang,<sup>1</sup> Dongying Cui,<sup>1</sup> Xueyin Qu,<sup>2</sup> Hong You, \*<sup>3</sup> Fan Lei,<sup>4</sup> Jianqiao Li,<sup>1</sup>

Yang Xie,<sup>1</sup> Haoshu Zhang,<sup>1</sup> Yongjiu Zhang,<sup>1</sup> Shilong Jiang,<sup>1</sup> Qinggang Xie\*<sup>1</sup>

1 Heilongjiang Feihe Dairy Co., Ltd., Beijing 100015, China

2 China Excellent Milk Academy (Tianjin) Co., Ltd. 300400, Tianjin

3 Eurofins US Food, 2200 Rittenhouse St Ste 175 Des Moines, IA, 50321-3155

United States.

4 Tsinghua University, State Key Laboratory of Membrane Biology, Beijing, 100084,

China

\* Co-Corresponding Author: Hong You, Email: [hong.you@eurofinsus.com](mailto:hong.you@eurofinsus.com) Tel: +1-

5157081576.

\* Co-Corresponding Author: Qinggang Xie, Email: [xieqinggang@feihe.com](mailto:xieqinggang@feihe.com) Tel:

+8610-6431766, Fax: +8610-6431766.

---

## Experiment

### Identification of OPN Purity by mass balance calculation

Residual water was determined by Karl Fischer Analysis based on the *Chinese Pharmacopoeia, 2020 Edition* (Four General Principles 0832, the First Law). The determination of total ash content by gravimetric method is based on the *Chinese Pharmacopoeia, 2020 Edition* (Part IV General Rule 2302). The mass balance calculation followed the equation below.

$$\text{OPN purity \%} = \frac{(100 - \text{wt\%water} - \text{wt\%ash}) \times \text{ChromPurity}}{100}$$

---

## Figures

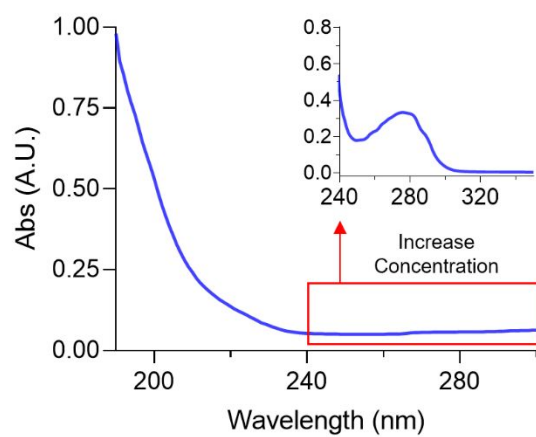

**Figure S1 UV absorption spectrogram of bovine OPN.**

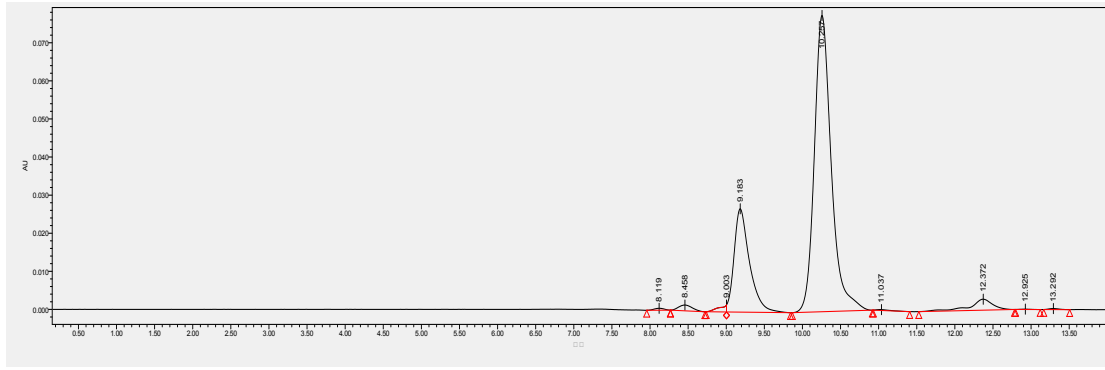

**Figure S2 SEC chromatogram of bovine OPN.**

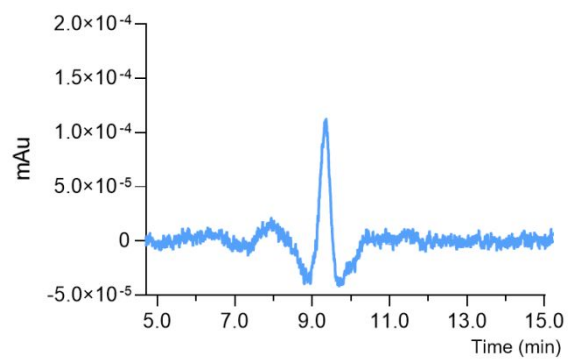

**Figure S3 Lowest detection limit result at 0.04 mg/100g.**

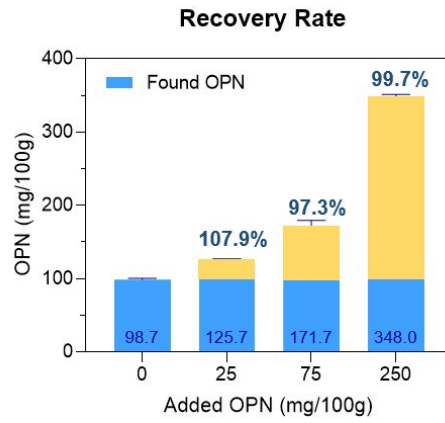

**Figure S4 Recovery rates of OPN in milk samples (n=10) at three different concentrations.**

---

## Tables

**Table S1. The purity validation data by mass balance calculation wt. %**

---

| Items      | Water<br>content % | Ash content % | Chromatogram Purity % | Actual Purity % |
|------------|--------------------|---------------|-----------------------|-----------------|
| 1          | 0.83               | 3.3           | 94.19                 | 90.30           |
| 2          | 0.83               | 3.2           | 93.28                 | 89.52           |
| 3          | 0.82               | 3.2           | 94.14                 | 90.37           |
| 4          | 0.81               | 3.1           | 93.24                 | 89.59           |
| 5          | 0.81               | 3.1           | 94.12                 | 90.49           |
| 6          | 0.80               | 3.0           | 93.24                 | 89.67           |
| 7          | 0.80               | 3.0           | 94.08                 | 90.51           |
| 8          | 0.79               | 3.0           | 93.23                 | 89.72           |
| 9          | 0.79               | 2.9           | 94.04                 | 90.55           |
| 10         | 0.78               | 2.9           | 93.14                 | 89.71           |
| <b>AVE</b> | <b>0.81</b>        | <b>3.07</b>   | <b>93.67</b>          | <b>90.04</b>    |
| <b>RSD</b> | <b>2.03</b>        | <b>4.19</b>   | <b>0.50</b>           | <b>0.48</b>     |

---

---

**Table S2. Particle composition content analysis of OPN in the buffer of THAM**

---

| No.      | Sedimentation co.<br>(S) | M. W.<br>(KD) | Aera (%)      | Normalized content<br>(wt.%) | Particle size<br>(nm) |
|----------|--------------------------|---------------|---------------|------------------------------|-----------------------|
| 1        | 0.75                     | 13.7          | 4.95%         | 5.29%                        | 4.39                  |
| <b>2</b> | <b>1.508</b>             | <b>39.3</b>   | <b>84.91%</b> | <b>90.68%</b>                | <b>6.22</b>           |
| 3        | 3.152                    | 118.8         | 1.72%         | 1.84%                        | 8.99                  |
| 4        | 4.462                    | 211.1         | 1.01%         | 1.08%                        | 10.89                 |
| 5        | 14.95                    | 1227.2        | 1.05%         | 1.12%                        | 19.58                 |

---



---

**Table S3. Particle composition content analysis of OPN with buffer of PBS**

---

| No. | Sedimentation co.<br>(S) | M. W.<br>(KD) | Aera (%) | Normalized<br>content (wt.%) | Particle size<br>(nm) |
|-----|--------------------------|---------------|----------|------------------------------|-----------------------|
| 1   | 0.23                     | 1.75          | 11.919   | 12.09                        | 1.79                  |
| 2   | 1.25                     | 21.58         | 11.586   | 11.75                        | 4.13                  |
| 3   | 1.70                     | 34.45         | 71.84    | 72.85                        | 4.82                  |
| 4   | 3.58                     | 104.88        | 1.23     | 1.25                         | 6.99                  |
| 5   | 11.64                    | 615.63        | 0.209    | 0.21                         | 12.61                 |
| 6   | 13.76                    | 790.83        | 0.219    | 0.22                         | 13.71                 |
| 7   | 15.27                    | 924.92        | 0.117    | 0.12                         | 14.44                 |
| 8   | 17.17                    | 1102.12       | 0.155    | 0.16                         | 15.31                 |
| 9   | 19.47                    | 1341.00       | 0.495    | 0.50                         | 16.35                 |
| 10  | 24.32                    | 1858.57       | 0.845    | 0.86                         | 18.23                 |

---

---

**Table S4. System suitability test #1 by the 25 mg/L standard (n = 6)**

| Injection Name        | Ret. Time    | Rel. Area    | Area         | Height       |
|-----------------------|--------------|--------------|--------------|--------------|
| Selected Peak:        | (min)        | (%)          | (mAU*min)    | (mAU)        |
| STD × Suitability#1 1 | 9.123        | 100          | 206423       | 7875         |
| STD × Suitability#1 2 | 9.117        | 100          | 206301       | 7900         |
| STD × Suitability#1 3 | 9.121        | 100          | 205463       | 7846         |
| STD × Suitability#1 4 | 9.117        | 100          | 204939       | 7818         |
| STD × Suitability#1 5 | 9.113        | 100          | 204340       | 7778         |
| STD × Suitability#1 6 | 9.115        | 100          | 204279       | 7755         |
| <b>RSD</b>            | <b>0.04%</b> | <b>0.00%</b> | <b>0.46%</b> | <b>0.71%</b> |

---

---

**Table S5. System suitability test #2 by the 25 mg/L standard (n = 6)**

| Injection Name        | Ret. Time    | Rel. Area    | Area         | Height       |
|-----------------------|--------------|--------------|--------------|--------------|
| Selected Peak:        | (min)        | (%)          | (mAU*min)    | (mAU)        |
| STD × Suitability#2 1 | 9.119        | 100          | 201996       | 7611         |
| STD × Suitability#2 2 | 9.121        | 100          | 200954       | 7574         |
| STD × Suitability#2 3 | 9.117        | 100          | 200329       | 7510         |
| STD × Suitability#2 4 | 9.118        | 100          | 208420       | 7991         |
| STD × Suitability#2 5 | 9.121        | 100          | 207972       | 7987         |
| STD × Suitability#2 6 | 9.124        | 100          | 207291       | 7933         |
| <b>RSD</b>            | <b>0.03%</b> | <b>0.00%</b> | <b>1.85%</b> | <b>2.90%</b> |

---

---

**Table S6. Stability test for the 25 mg/L standard (n = 6)**

| Intervals | Injection Name    | Ret. Time    | Rel. Area    | Area         | Height       |
|-----------|-------------------|--------------|--------------|--------------|--------------|
| (h)       | Selected Peak:    | (min)        | (%)          | (mAU*min)    | (mAU)        |
| 0         | STD × Stability 1 | 9.111        | 100          | 203455       | 7724         |
| 2         | STD × Stability 2 | 9.116        | 100          | 202233       | 7669         |
| 8         | STD × Stability 3 | 9.124        | 100          | 211663       | 8199         |
| 12        | STD × Stability 4 | 9.125        | 100          | 210214       | 8128         |
| 24        | STD × Stability 5 | 9.122        | 100          | 209827       | 8113         |
| 48        | STD × Stability 6 | 9.123        | 100          | 209433       | 8061         |
|           | <b>RSD</b>        | <b>0.06%</b> | <b>0.00%</b> | <b>1.89%</b> | <b>2.84%</b> |

---

**Table S7. Accuracy test (recovery rate) of OPN (n=10)**

| No. | Samples   | Standard addition level (mg/100g) | Content mg/100g | Average mg/100g | Recovery Rate % | RSD% |
|-----|-----------|-----------------------------------|-----------------|-----------------|-----------------|------|
| 1   | 22T034-1  |                                   | 101.78          |                 |                 |      |
| 2   | 22T034-2  |                                   | 98.25           |                 |                 |      |
| 3   | 22T034-3  |                                   | 96.53           |                 |                 |      |
| 4   | 22T034-4  |                                   | 99.57           |                 |                 |      |
| 5   | 22T034-5  | 0                                 | 99.22           | 98.72           | -               | 1.95 |
| 6   | 22T034-6  |                                   | 96.66           |                 |                 |      |
| 7   | 22T034-7  |                                   | 99.93           |                 |                 |      |
| 8   | 22T034-8  |                                   | 95.88           |                 |                 |      |
| 9   | 22T034-9  |                                   | 98.61           |                 |                 |      |
| 10  | 22T034-10 |                                   | 100.77          |                 |                 |      |
| 11  | 22T034-1  |                                   | 122.98          |                 |                 |      |
| 12  | 22T034-2  |                                   | 125.38          |                 |                 |      |
| 13  | 22T034-3  |                                   | 127.04          |                 |                 |      |
| 14  | 22T034-4  |                                   | 124.57          |                 |                 |      |
| 15  | 22T034-5  | 25                                | 126.52          | 125.69          | 107.8           | 1.27 |
| 16  | 22T034-6  |                                   | 125.30          |                 |                 |      |
| 17  | 22T034-7  |                                   | 127.85          |                 |                 |      |
| 18  | 22T034-8  |                                   | 127.73          |                 |                 |      |
| 19  | 22T034-9  |                                   | 124.03          |                 |                 |      |
| 20  | 22T034-10 |                                   | 125.50          |                 |                 |      |
| 21  | 22T034-1  |                                   | 173.26          |                 |                 |      |
| 22  | 22T034-2  |                                   | 167.04          |                 |                 |      |
| 23  | 22T034-3  |                                   | 174.72          |                 |                 |      |
| 24  | 22T034-4  |                                   | 169.51          |                 |                 |      |
| 25  | 22T034-5  | 75                                | 163.62          | 171.73          | 97.3            | 4.42 |
| 26  | 22T034-6  |                                   | 169.77          |                 |                 |      |
| 27  | 22T034-7  |                                   | 166.81          |                 |                 |      |
| 28  | 22T034-8  |                                   | 190.90          |                 |                 |      |
| 29  | 22T034-9  |                                   | 167.96          |                 |                 |      |
| 30  | 22T034-10 |                                   | 173.67          |                 |                 |      |
| 31  | 22T034-1  |                                   | 341.68          |                 |                 |      |
| 32  | 22T034-2  |                                   | 349.40          |                 |                 |      |
| 33  | 22T034-3  |                                   | 347.94          |                 |                 |      |
| 34  | 22T034-4  |                                   | 348.42          |                 |                 |      |
| 35  | 22T034-5  | 250                               | 352.71          | 348.01          | 99.7            | 0.96 |
| 36  | 22T034-6  |                                   | 347.37          |                 |                 |      |
| 37  | 22T034-7  |                                   | 343.51          |                 |                 |      |
| 38  | 22T034-8  |                                   | 351.85          |                 |                 |      |
| 39  | 22T034-9  |                                   | 348.06          |                 |                 |      |
| 40  | 22T034-10 |                                   | 349.17          |                 |                 |      |
